# Supplementary material
Source: HighWire-hosted journal article supplement (https://www.haematologica.org/content/suppl/2018/03/02/haematol.2017.178103)
Supplement: HAEMATOL-2017-178103v4-Blimark-01.pdf [file HAEMATOL-2017-178103v4-Blimark-01.pdf]

# The first report on population-based data on characteristics, treatment and survival on Swedish myeloma patients diagnosed from 2008 through 2016

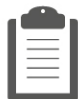

Swedish Myeloma Registry

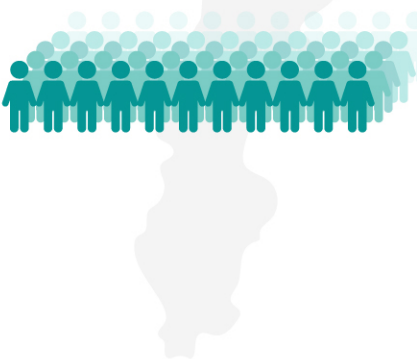

**4904** Multiple myeloma patients diagnosed between 2008-2016

**3988** 81.3% Multiple myeloma (MM)

**916** 18.6% Smoldering multiple myeloma (SMM)

Median age: 71 years    ♂ 70 years    ♀ 72 years

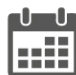

Median time of follow-up: 4.9 years

## Survival rate in all myeloma patients

1-year SR

|           |                         |
|-----------|-------------------------|
| 1973-1982 | 0.69 (95% CI:0.67-0.70) |
| 1983-1992 | 0.74 (95% CI:0.73-0.75) |
| 1993-2002 | 0.77 (95% CI:0.76-0.78) |
| 2003-2013 | 0.82 (95% CI:0.81-0.83) |

## Median relative survival in MM

7.7 years for patients ≤ 65 years  
3.4 years for patients ≥ 66 years

## Treatment in all myeloma patients

- High-dose therapy with ASCT → 77% patients ≤ 66 years, 22% patients = 66-70 years
- Allogeneic transplantation → 1% patients
- Bisphosphonates → 79% patients ≤ 65 years
- Bortezomib, thalidomide, and/or lenalidomide → 31% patients in 2008 .....→ 81% patients in 2014
